# Supplementary material for: Analysis of HPV-Positive and HPV-Negative Head and Neck Squamous Cell Carcinomas and Paired Normal Mucosae Reveals Cyclin D1 Deregulation and Compensatory Effect of Cyclin D2
Source: MDPI journal article supplement (doi:10.3390/cancers12040792), 2020-03-26
Supplement: s1 [file s1]

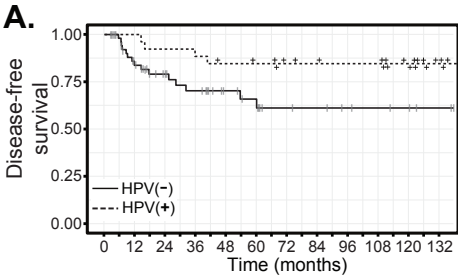

|        |                |    |    |    |    |    |    |    |    |    |    |    |    |    |    |    |
|--------|----------------|----|----|----|----|----|----|----|----|----|----|----|----|----|----|----|
| HPV(-) | 56             | 50 | 39 | 31 | 29 | 25 | 24 | 20 | 17 | 15 | 13 | 9  | 9  | 8  | 8  | 7  |
| HPV(+) | 26             | 26 | 26 | 24 | 24 | 24 | 23 | 22 | 21 | 21 | 20 | 20 | 17 | 16 | 16 | 15 |
|        | Number at risk |    |    |    |    |    |    |    |    |    |    |    |    |    |    |    |

Number at risk

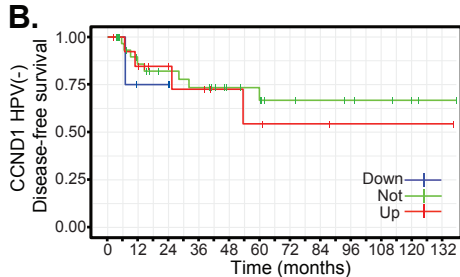

|      |    |    |    |    |    |    |    |    |    |    |    |   |   |   |   |   |   |   |   |   |   |   |   |   |
|------|----|----|----|----|----|----|----|----|----|----|----|---|---|---|---|---|---|---|---|---|---|---|---|---|
| Down | 4  | 4  | 2  | 2  | 2  | 0  | 0  | 0  | 0  | 0  | 0  | 0 | 0 | 0 | 0 | 0 | 0 | 0 | 0 | 0 | 0 | 0 | 0 | 0 |
| Not  | 33 | 28 | 23 | 20 | 19 | 18 | 17 | 15 | 12 | 11 | 10 | 7 | 7 | 6 | 6 | 5 | 4 | 4 | 3 | 3 | 1 | 1 |   |   |
| Up   | 14 | 13 | 11 | 8  | 7  | 6  | 6  | 4  | 4  | 3  | 3  | 2 | 2 | 2 | 2 | 1 | 1 | 1 | 1 | 1 | 1 | 1 | 1 | 1 |

Number at risk

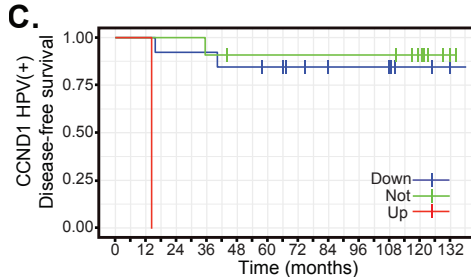

|      |    |    |    |    |    |    |    |    |    |    |    |   |   |   |   |   |   |   |   |   |   |   |   |   |
|------|----|----|----|----|----|----|----|----|----|----|----|---|---|---|---|---|---|---|---|---|---|---|---|---|
| Down | 13 | 13 | 13 | 12 | 12 | 12 | 11 | 11 | 11 | 10 | 10 | 8 | 7 | 6 | 6 | 6 | 6 | 3 | 3 | 2 | 2 | 1 |   |   |
| Not  | 11 | 11 | 11 | 11 | 11 | 10 | 10 | 9  | 9  | 9  | 9  | 9 | 9 | 9 | 9 | 9 | 9 | 8 | 7 | 3 | 2 | 0 |   |   |
| Up   | 1  | 1  | 1  | 0  | 0  | 0  | 0  | 0  | 0  | 0  | 0  | 0 | 0 | 0 | 0 | 0 | 0 | 0 | 0 | 0 | 0 | 0 | 0 | 0 |

Number at risk

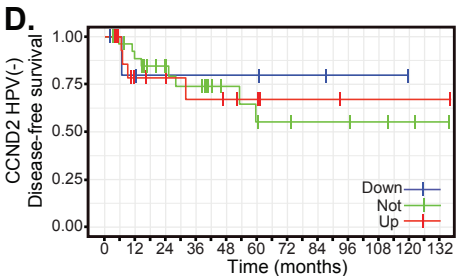

|      |    |    |    |    |    |    |    |    |   |   |   |   |   |   |   |   |   |   |   |   |   |   |   |   |
|------|----|----|----|----|----|----|----|----|---|---|---|---|---|---|---|---|---|---|---|---|---|---|---|---|
| Down | 6  | 5  | 4  | 3  | 3  | 3  | 3  | 3  | 3 | 3 | 2 | 2 | 2 | 2 | 1 | 1 | 1 | 1 | 1 | 0 | 0 |   |   |   |
| Not  | 28 | 26 | 23 | 19 | 17 | 14 | 14 | 10 | 8 | 7 | 6 | 5 | 5 | 4 | 4 | 4 | 4 | 3 | 3 | 2 | 2 | 1 | 1 |   |
| Up   | 17 | 14 | 9  | 8  | 8  | 7  | 6  | 6  | 5 | 4 | 4 | 2 | 2 | 2 | 2 | 2 | 1 | 1 | 1 | 1 | 1 | 1 | 1 | 1 |

Number at risk

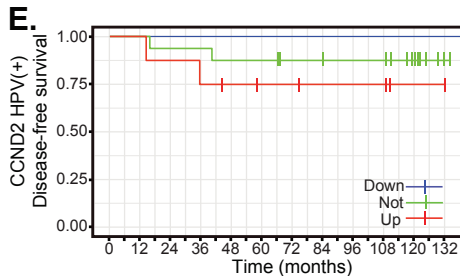

|      |    |    |    |    |    |    |    |    |    |    |    |    |    |    |    |    |    |    |   |   |   |   |   |   |
|------|----|----|----|----|----|----|----|----|----|----|----|----|----|----|----|----|----|----|---|---|---|---|---|---|
| Down | 1  | 1  | 1  | 1  | 1  | 1  | 1  | 1  | 1  | 1  | 1  | 1  | 1  | 1  | 1  | 1  | 1  | 1  | 1 | 1 | 1 | 1 | 1 | 1 |
| Not  | 16 | 16 | 16 | 15 | 15 | 15 | 15 | 14 | 14 | 14 | 14 | 14 | 12 | 12 | 11 | 11 | 11 | 11 | 9 | 8 | 3 | 2 | 0 |   |
| Up   | 8  | 8  | 8  | 7  | 7  | 7  | 6  | 6  | 5  | 5  | 4  | 4  | 4  | 4  | 3  | 3  | 3  | 3  | 3 | 1 | 1 | 1 | 1 | 0 |

Number at risk
